administration in earlier positron emission tomography studies?<sup>14,15</sup> Is there any pharmacokinetic or pharmacodynamic difference between intravenous and oral psilocybin administration, which could modify the brain's rate of psilocin uptake, changing the neuroimaging patterns observed? These are the types of fundamental questions for future research.

## Competing Interests

The author declares no competing interests.

**Rafael G. dos Santos, Ph.D.**, Ribeirão Preto Medical School, University of São Paulo, Ribeirão Preto, Brazil, and International Center for Ethnobotanical Education, Research and Service, Halsteren, The Netherlands. banisteria@gmail.com

## References

1. Icaza EE, Mashour GA: Altered states: Psychedelics and anesthetics. *ANESTHESIOLOGY* 2013; 119:1255–60
2. Moreno JL, Holloway T, Albizu L, Sealfon SC, González-Maeso J: Metabotropic glutamate mGlu2 receptor is necessary for the pharmacological and behavioral effects induced by hallucinogenic 5-HT<sub>2A</sub> receptor agonists. *Neurosci Lett* 2011; 493:76–9
3. Hanks JB, González-Maeso J: Animal models of serotonergic psychedelics. *ACS Chem Neurosci* 2013; 4:33–42
4. González-Maeso J, Ang RL, Yuen T, Chan P, Weisstaub NV, López-Giménez JF, Zhou M, Okawa Y, Callado LE, Milligan G, Gingrich JA, Filizola M, Meana JJ, Sealfon SC: Identification of a serotonin/glutamate receptor complex implicated in psychosis. *Nature* 2008; 452:93–7
5. Studerus E, Komater M, Hasler F, Vollenweider FX: Acute, subacute and long-term subjective effects of psilocybin in healthy humans: A pooled analysis of experimental studies. *J Psychopharmacol* 2011; 25:1434–52
6. Hermle L, Fünfgeld M, Oepen G, Botsch H, Borchardt D, Gouzoulis E, Fehrenbach RA, Spitzer M: Mescaline-induced psychopathological, neuropsychological, and neurometabolic effects in normal subjects: Experimental psychosis as a tool for psychiatric research. *Biol Psychiatry* 1992; 32:976–91
7. Daumann J, Heekeren K, Neukirch A, Thiel CM, Möller-Hartmann W, Gouzoulis-Mayfrank E: Pharmacological modulation of the neural basis underlying inhibition of return (IOR) in the human 5-HT<sub>2A</sub> agonist and NMDA antagonist model of psychosis. *Psychopharmacology (Berl)* 2008; 200:573–83
8. Daumann J, Wagner D, Heekeren K, Neukirch A, Thiel CM, Gouzoulis-Mayfrank E: Neuronal correlates of visual and auditory alertness in the DMT and ketamine model of psychosis. *J Psychopharmacol* 2010; 24:1515–24
9. Riba J, Romero S, Grasa E, Mena E, Carrió I, Barbanoj MJ: Increased frontal and paralimbic activation following ayahuasca, the pan-Amazonian inebriant. *Psychopharmacology (Berl)* 2006; 186:93–8
10. Dos Santos RG, Valle M, Bouso JC, Nomdedéu JF, Rodríguez-Espinoza J, McIlhenny EH, Barker SA, Barbanoj MJ, Riba J: Autonomic, neuroendocrine, and immunological effects of ayahuasca: A comparative study with D-amphetamine. *J Clin Psychopharmacol* 2011; 31: 717–26
11. Dos Santos RG, Grasa E, Valle M, Ballester MR, Bouso JC, Nomdedéu JF, Homs R, Barbanoj MJ, Riba J: Pharmacology of ayahuasca administered in two repeated doses. *Psychopharmacology (Berl)* 2012; 219:1039–53
12. de Araujo DB, Ribeiro S, Cecchi GA, Carvalho FM, Sanchez TA, Pinto JP, de Martinis BS, Crippa JA, Hallak JE, Santos AC: Seeing with the eyes shut: Neural basis of enhanced imagery following Ayahuasca ingestion. *Hum Brain Mapp* 2012; 33:2550–60
13. Carhart-Harris RL, Erritzoe D, Williams T, Stone JM, Reed LJ, Colasanti A, Tyacke RJ, Leech R, Malizia AL, Murphy K, Hobden P, Evans J, Feilding A, Wise RG, Nutt DJ: Neural correlates of the psychedelic state as determined by fMRI studies with psilocybin. *Proc Natl Acad Sci U S A* 2012; 109:2138–43
14. Vollenweider FX, Leenders KL, Scharfetter C, Maguire P, Stadelmann O, Angst J: Positron emission tomography and fluorodeoxyglucose studies of metabolic hyperfrontality and psychopathology in the psilocybin model of psychosis. *Neuropsychopharmacology* 1997; 16:357–72
15. Gouzoulis-Mayfrank E, Schreckenberger M, Sabri O, Arning C, Thelen B, Spitzer M, Kovar KA, Hermle L, Büll U, Sass H: Neurometabolic effects of psilocybin, 3,4-methylenedioxymethylamphetamine (MDA) and D-methamphetamine in healthy volunteers. A double-blind, placebo-controlled PET study with [18F]FDG. *Neuropsychopharmacology* 1999; 20:565–81

(Accepted for publication March 5, 2014.)

## In Reply:

We thank Dr. dos Santos for his interest in our article<sup>1</sup> and his scholarly perspective regarding the neurobiology of the psychedelic state. In response to his comments, our focus on the glutamatergic *N*-methyl-D-aspartate receptor was motivated by the pharmacology of anesthetic drugs that have been more strongly associated with psychedelic experiences in humans; we did not argue that these receptors were the primary molecular targets for psychedelic drugs themselves. In terms of neuroimaging studies, we thank Dr. dos Santos for the additional references and we acknowledge that the article by Carhart-Harris *et al.*<sup>2</sup> is not the only neuroimaging study on the psychedelic state. It would have been more precise for us to state that it is the only neuroimaging study focused on *connectivity* during the psychedelic state in humans. By contrast, the studies referenced by Dr. dos Santos focused on neural activity. The findings by Carhart-Harris *et al.* regarding connectivity allowed us to make comparisons with more recent studies on anesthetic-induced unconsciousness. Finally, we agree with Dr. dos Santos that there are many more exciting questions to be addressed in this area of investigation.

## Competing Interests

The authors declare no competing interests.

**George A. Mashour, M.D., Ph.D., Eduardo E. Icaza, M.D.** University of Michigan Medical School, Ann Arbor, Michigan (G.A.M.). gmashour@umich.edu

## References

1. Icaza EE, Mashour GA: Altered states: Psychedelics and anesthetics. *ANESTHESIOLOGY* 2013; 119:1255–60

2. Carhart-Harris RL, Erritzoe D, Williams T, Stone JM, Reed LJ, Colasanti A, Tyacke RJ, Leech R, Malizia AL, Murphy K, Hobden P, Evans J, Feilding A, Wise RG, Nutt DJ: Neural correlates of the psychedelic state as determined by fMRI studies with psilocybin. *Proc Natl Acad Sci U S A* 2012; 109:2138–43

(Accepted for publication March 5, 2014.)

## Hypoxia-inducible Factors Are Already “Active” in the Von Hippel-Lindau–deficient Renal Cell Carcinoma-4 Cells

To the Editor:

I read with great interest the article by Benzonana *et al.*<sup>1</sup> investigating the effect of isoflurane on the cellular function of renal cell carcinoma (RCC)-4 cells, which are derived from human RCC.

I think that there are several issues in this study that deserve comments.

In this study, the authors exclusively used the RCC cell line, namely RCC4 cells. It is well known that the tumor suppressor gene Von Hippel-Lindau is deficient in these cells. Because Von Hippel-Lindau plays a critical role in the regulation of stability of hypoxia-inducible factor (HIF)- $\alpha$  proteins in cells, HIF-1 $\alpha$  and HIF-2 $\alpha$  proteins are “stabilized” or overexpressed in RCC4 cells even under 20% O<sub>2</sub> conditions<sup>2,3</sup> and the expression is not increased under 1% O<sub>2</sub> conditions.<sup>2,3</sup>

However, as demonstrated in figure 1 of their study, HIF-1 $\alpha$  and HIF-2 $\alpha$  proteins only barely expressed in RCC4 cells under 20% O<sub>2</sub> conditions, as shown by them. I would like to ask the authors to explain the discrepancy between this and the original report.<sup>2</sup>

One of the features of malignant tumors is the hypoxic region in them, where the activation of HIFs is observed.<sup>4</sup> Thus, I think that it is essential to investigate the effect of isoflurane under such hypoxic conditions. In this study, the authors exclusively performed the assays under 20% O<sub>2</sub> conditions or normoxic conditions. However, we reported that the volatile anesthetic halothane inhibited hypoxia-induced HIF-1 activation in Hep3B cells<sup>5</sup> and that isoflurane suppresses HIF-2 activation under hypoxemic hypoxia in mice.<sup>6</sup> The ontology behind this discrepancy should be clarified.

The authors argue that isoflurane could promote the expression of HIF-1 $\alpha$  and HIF-2 $\alpha$ , which are subunits of the transcription factors HIF-1 and HIF-2, respectively, and that isoflurane might enhance the cellular activities that are associated with a malignant phenotype in the cells in HIFs-dependent manner. I totally agree that both HIF-1 and HIF-2 play a critical role in cancer progression by providing procarcinogenic microenvironment. In figure 4 of their study, the authors indicated that 2% isoflurane treatment enhanced cell growth or proliferation by 3-(4,5-dimethylthiazol-2-yl)-2,5-diphenyltetrazolium bromide assay. However, there is no consensus that HIFs act as

an “oncogene.” I wonder by which molecular mechanisms the authors think HIFs enhance the cell proliferation.

In addition, I think that the argument that isoflurane enhances tumorigenesis in a HIFs-dependent manner is under discussion. No experimental evidence was demonstrated to indicate that the “induction” of HIFs- $\alpha$  protein is essential for the increases in RCC4 proliferation as examined by 3-(4,5-dimethylthiazol-2-yl)-2,5-diphenyltetrazolium bromide assay in their study.

Usually, the patients are exposed to the anesthetics only during the surgical treatment. That means the duration is not so long and transient. Do the authors have any experimental results on the reversibility of isoflurane on HIFs- $\alpha$  expression?

Finally, the authors described that LY294002 is a protein kinase B (Akt) inhibitor. However, almost all molecular biologists think that LY294002 is a phosphoinositide 3 kinase inhibitor.<sup>7</sup>

### Acknowledgments

This work was supported by Japan Society for the Promotion of Science, Tokyo, Japan (KAKENHI grant numbers 22390298, 24659695, 24592336, and 21591992).

### Competing Interests

The author declares no competing interests.

**Kiichi Hirota, M.D., Ph.D.**, Kansai Medical University, Hirakata, Osaka, Japan. hif1@mac.com

### References

1. Benzonana LL, Perry NJ, Watts HR, Yang B, Perry IA, Coombes C, Takata M, Ma D: Isoflurane, a commonly used volatile anesthetic, enhances renal cancer growth and malignant potential *via* the hypoxia-inducible factor cellular signaling pathway *in vitro*. *ANESTHESIOLOGY* 2013; 119:593–605
2. Maxwell PH, Wiesener MS, Chang GW, Clifford SC, Vaux EC, Cockman ME, Wykoff CC, Pugh CW, Maher ER, Ratcliffe PJ: The tumour suppressor protein VHL targets hypoxia-inducible factors for oxygen-dependent proteolysis. *Nature* 1999; 399:271–5
3. Hirota K, Semenza GL: Regulation of hypoxia-inducible factor 1 by prolyl and asparaginyl hydroxylases. *Biochem Biophys Res Commun* 2005; 338:610–6
4. Hanahan D, Weinberg RA: Hallmarks of cancer: The next generation. *Cell* 2011; 144:646–74
5. Itoh T, Namba T, Fukuda K, Semenza GL, Hirota K: Reversible inhibition of hypoxia-inducible factor 1 activation by exposure of hypoxic cells to the volatile anesthetic halothane. *FEBS Lett* 2001; 509:225–9
6. Tanaka T, Kai S, Koyama T, Daijo H, Adachi T, Fukuda K, Hirota K: General anesthetics inhibit erythropoietin induction under hypoxic conditions in the mouse brain. *PLoS One* 2011; 6:e29378
7. Vlahos CJ, Matter WF, Hui KY, Brown RF: A specific inhibitor of phosphatidylinositol 3-kinase, 2-(4-morpholinyl)-8-phenyl-4H-1-benzopyran-4-one (LY294002). *J Biol Chem* 1994; 269:5241–8

(Accepted for publication March 6, 2014.)
